# Supplementary material for: Comparison between Policaptil Gel Retard and Metformin by Testing of Temporal Changes in Patients with Metabolic Syndrome and Type 2 Diabetes
Source: MDPI journal article supplement (doi:10.3390/diabetology3020022), 2022-04-26
Supplement: s1 [file s1]

## Supplementary Material

**Table S1. Interpretation of the CV risk score.**

Individual risk score for major cardiovascular events (i.e., stroke or myocardial infarction) in the following 10 years. Risk re-evaluation is suggested at 6-month intervals for scores  $\geq 20\%$  suggest, and after three years for scores  $< 5\%$ . <http://www.cuore.iss.it/valutazione/calc-rischio>

### CV-RS Class

|     |                                                                                     |               |
|-----|-------------------------------------------------------------------------------------|---------------|
| VI  |    | $> 30\%$      |
| V   |    | $20\% - 30\%$ |
| IV  |   | $15\% - 20\%$ |
| III |  | $10\% - 15\%$ |
| II  |  | $5\% - 10\%$  |
| I   |  | $< 5\%$       |

Fig S1.

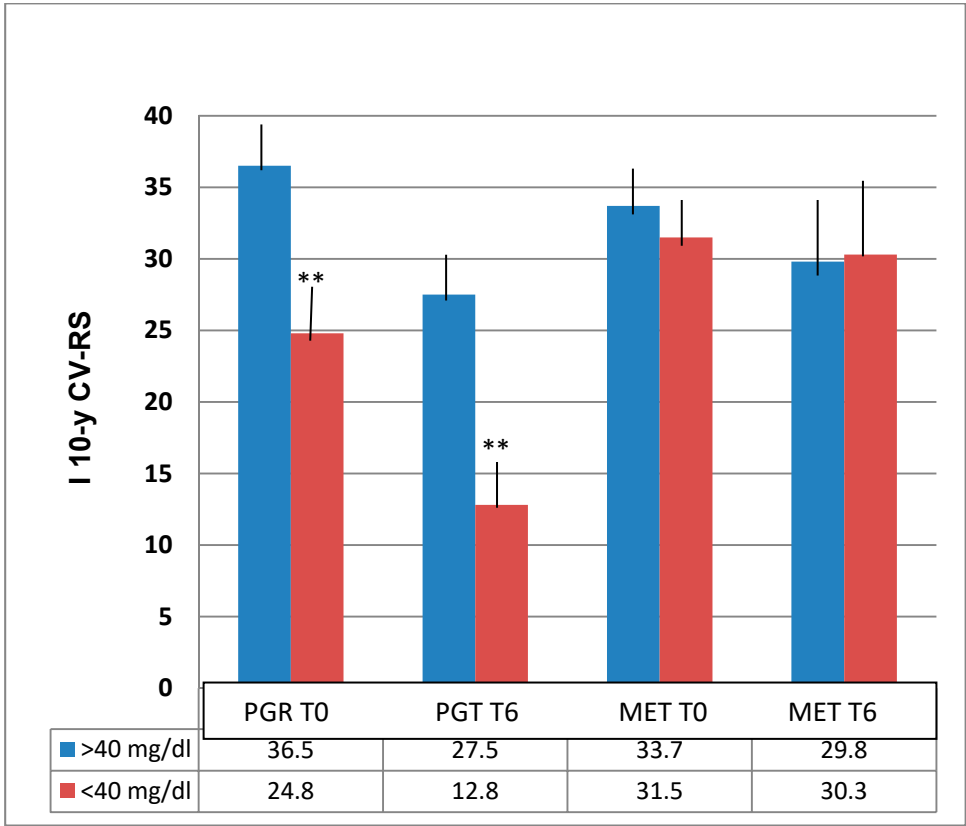

**Figure S1.** 10-y-CV-RS changes based on related HDL-Cholesterol level ( $\geq$  or  $<$  40 mg/dL, cut-off arbitrarily chosen independently of gender). \*\*  $p < 0.001$  vs T0, and T6. Differenced between PGR and MET were non significant at all of follow-up time.
